# Supplementary material for: Trends in Electronic Cigarette Use Among US Adults With a History of Cardiovascular Disease
Source: PubMed Central journal article supplement (PMC10427939; doi:10.1001/jamanetworkopen.2023.28962), 2023-08-15
Supplement: jamanetwopen-e2328962-s002.pdf [file jamanetwopen-e2328962-s002.pdf]

## Data Sharing Statement

Wen. Trends in Electronic Cigarette Use Among US Adults With a History of Cardiovascular Disease. *JAMA Netw Open*. Published August 15, 2023.

doi:10.1001/jamanetworkopen.2023.28962

### Data

**Data available:** Yes

**Data types:** Deidentified participant data

**How to access data:** <https://www.cdc.gov/nchs/nhis/data-questionnaires-documentation.htm>

**When available:** With publication

### Supporting Documents

**Document types:** None

### Additional Information

**Who can access the data:** anyone requesting the data

**Types of analyses:** for any purpose

**Mechanisms of data availability:** without investigator support
